# Supplementary material
Source: PubMed Central journal article supplement (PMC11028714)
Supplement: 262_2017_2029_MOESM1_ESM.pdf [file 262_2017_2029_MOESM1_ESM.pdf]

## Supplementary figure 1.

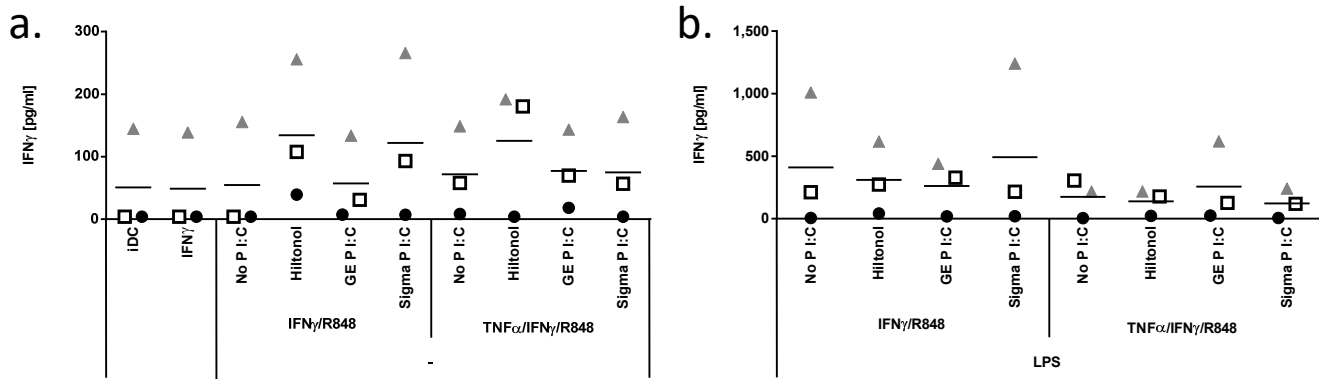

**Supplementary figure 1. IFN $\gamma$ -production by DC matured by different maturation cocktails.** Monocytes from three donors were analyzed for production of IFN  $\gamma$  after an initial 48 hours culture with GM-CSF/IL-4 followed by 18 hours with GM-CSF/IL-4/IFN $\gamma$ /R848 together with combinations of TNF  $\alpha$  and GMP-grade poly I:C Hiltonol<sup>®</sup> or non-GMP grade poly I:C from either GE Healthcare or Sigma-Aldrich without **(a)** or with addition of LPS **(b)**, and finally 4 days culture in 20 IU/ml IL-2 and 2% human AB serum. These DC were analyzed as a control to DC/T cell co-cultures.

## Supplementary figure 2

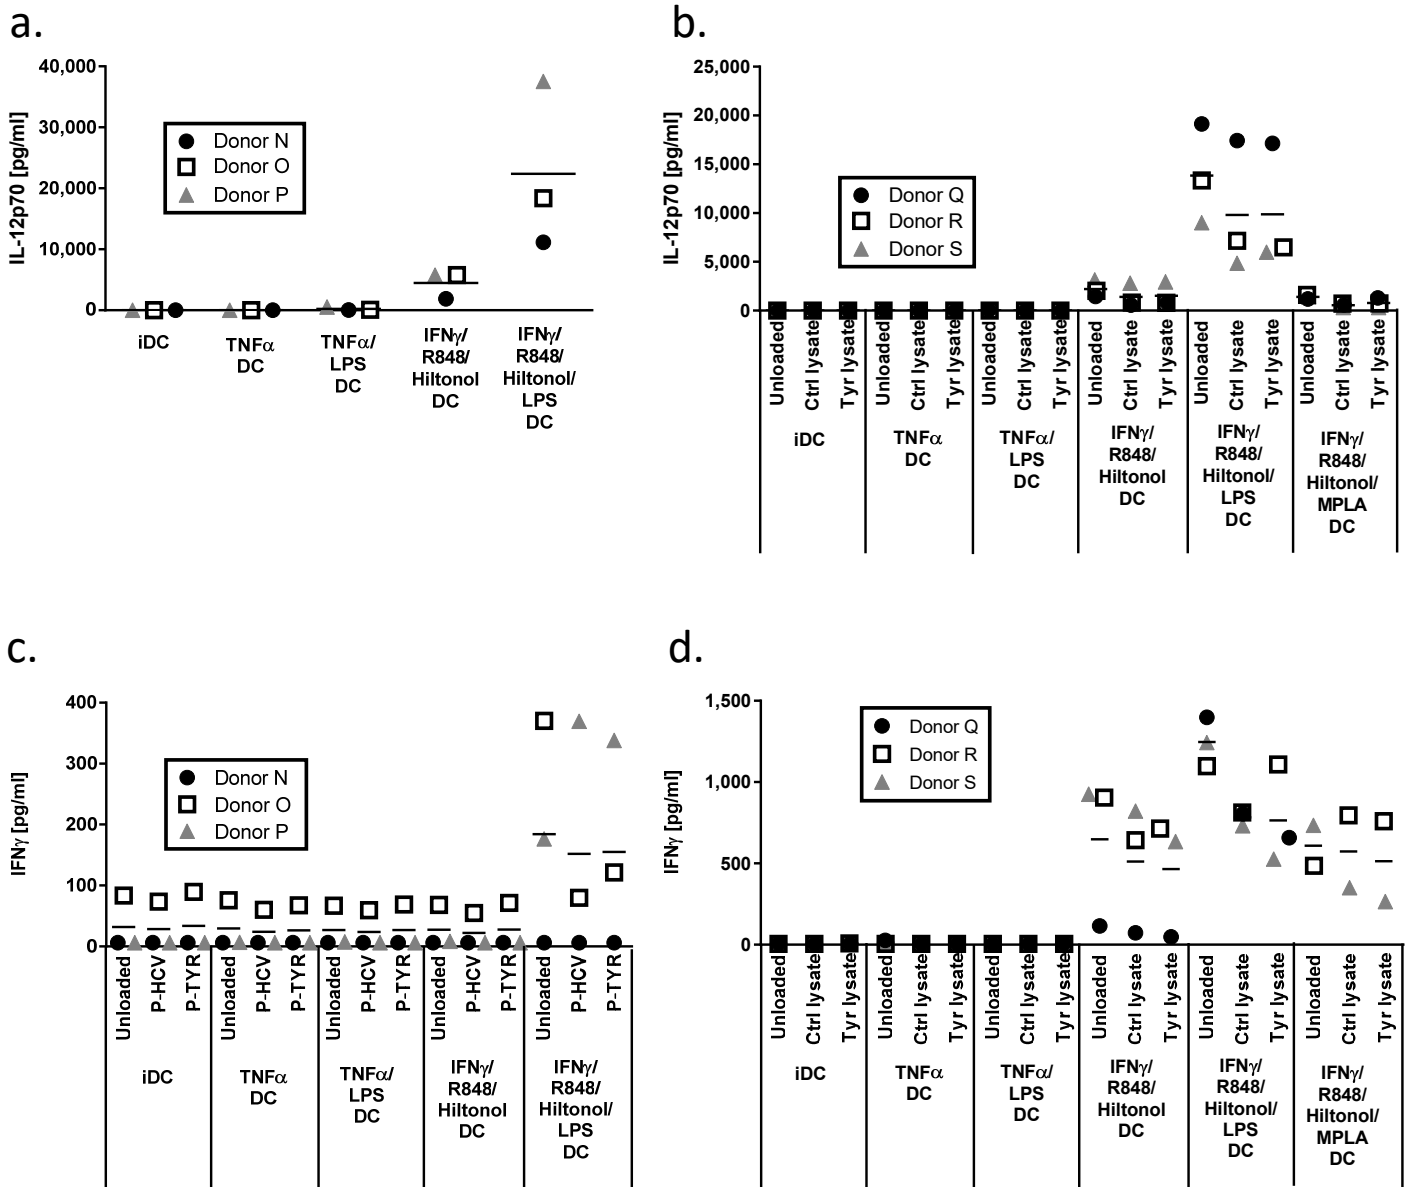

**Supplementary figure 2. IL12p70 and IFN $\gamma$ -production by DC matured by different maturation cocktails.** Monocytes from six donors were analyzed for production of IL12p70 (a – 3 donors, b – 3 donors) after an initial 48 hours culture with GM-CSF/IL-4 followed by harvest, wash and thereafter 18 hours with GM-CSF/IL-4, different combinations of TNF $\alpha$ , IFN $\gamma$ , R848, Hiltonol, LPS, monophosphoryl Lipid A (MPLA) and tumor cell-lysates from cells with or without tyrosinase expression (only b). Thereafter the mature DC were harvested, pulsed with HCV or tyrosinase peptides (only c) and further cultured for 4 days culture in 20IU/ml IL-2 and 2% human AB serum before IFN $\gamma$  levels were measured (c – 3 donors, d – 3 donors). These DC were analyzed as a control to DC/T cell co-cultures .

## Supplementary figure 3

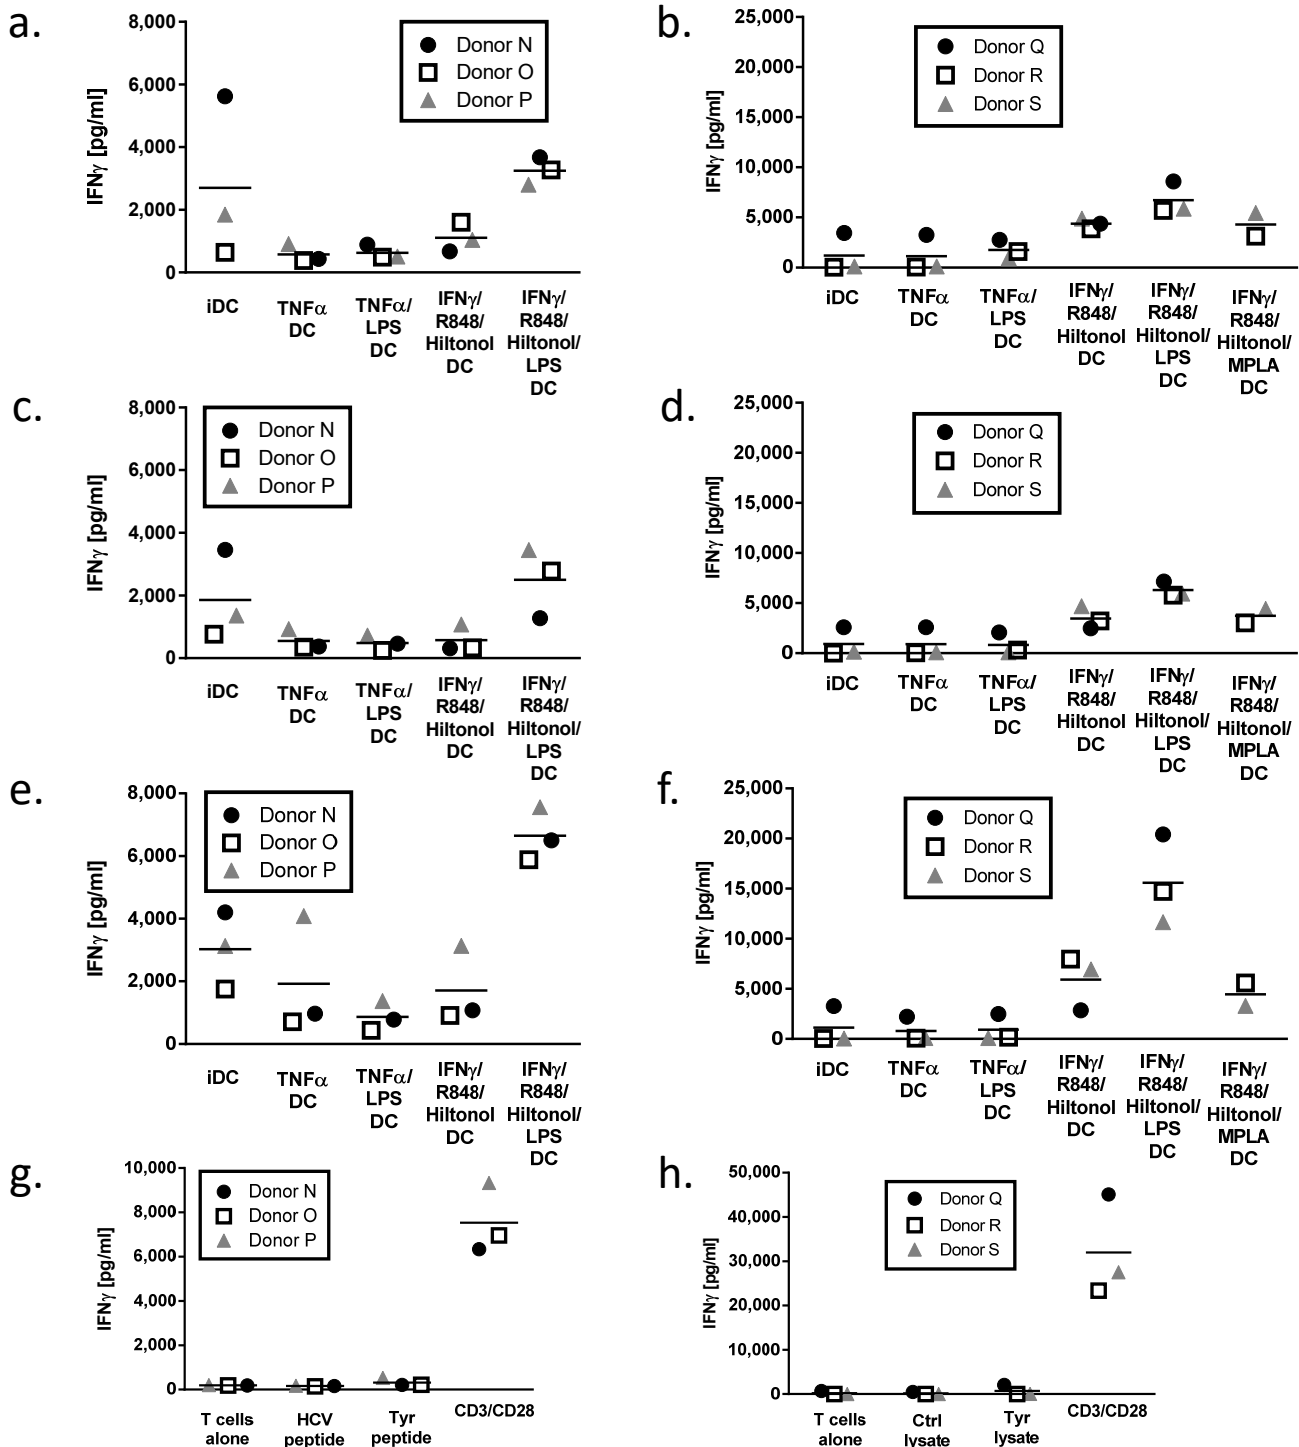

**Supplementary figure 3. Unnormalized data from activation of tyrosinase-specific T cells by tyrosinase-loaded monocyte-derived dendritic cells matured in presence of different stimulatory cocktails.** Monocytes from six donors were cultured 48 hours culture with GM-CSF/IL-4 followed by harvest, wash and thereafter 18 hours with GM-CSF/IL-4 and combinations of IFN $\gamma$ , TNF $\alpha$ , R848, GMP-grade poly I:C Hiltonol®, LPS and/or monophosphoryl Lipid A (MPLA) before being harvested and washed once again. The monocyte-derived dendritic cells from the first three donors were kept unloaded (**a**) or were pulsed with HCV (**c**) or tyrosinase (**e**) peptide and co-cultured with tyrosinase-specific allogeneic T cells before analyzing IFN  $\gamma$  levels. The monocyte-derived DC from the last three donors were kept unloaded (**b**) or were loaded with tumor cell lysate from either tyrosinase-negative A375 (**d**) cells or tyrosinase-transduced A375 (**f**) during the maturation from immature to mature dendritic cells. The dendritic cells were co-cultured with allogeneic tyrosinase-specific T cells and IFN  $\gamma$  production was analyzed. The T cells were also cultured alone, with directly added HCV/tyrosinase peptide or lysates from control and tyrosinase-expressing tumor cells or with CD3/CD28 beads (**g, h**).
